# Supplementary material for: A π-extended luminogen with colorimetric and off/on fluorescent multi-channel detection for Cu2+ with extremely high selectivity and sensitivity via nonarylamine-based organic mixed valence
Source: Royal Society of Chemistry journal article supplement (doi:10.1039/c6ra16631h), 2016-01-01
Supplement: c6ra16631h1.pdf [file c6ra16631h1.pdf]

## *RSC Adv*

### *Supplementary Information*

**A  $\pi$ -extended luminogen with colorimetric and off/on fluorescent multi-channel detection for  $\text{Cu}^{2+}$  in high selectivity and sensitivity via nonarylamine-based organic mixed-valence**

Ruizhi Tang,<sup>a</sup> Xinyang Wang,<sup>a</sup> Wanzheng Zhang,<sup>a</sup> Xiaodong Zhuang,<sup>\*,a</sup> Shuai Bi,<sup>a</sup> Wenbei Zhang,<sup>a</sup> Yiyong Mai,<sup>a</sup> Fan Zhang,<sup>\*,a</sup>

<sup>a</sup> School of Chemistry and Chemical engineering, State Key Laboratory of Metal Matrix Composites, Shanghai Jiao Tong University, Shanghai 200240, P. R. China

E-mail: [fan-zhang@sjtu.edu.cn](mailto:fan-zhang@sjtu.edu.cn); [zhuang@sjtu.edu.cn](mailto:zhuang@sjtu.edu.cn)

## Table of Contents

|                                                                     |    |
|---------------------------------------------------------------------|----|
| 1. Optical Spectra                                                  | S2 |
| 2. <sup>1</sup> H and <sup>13</sup> C NMR Spectra for New Compounds | S5 |
| 3. References                                                       | S8 |

## 1 Optical Spectra

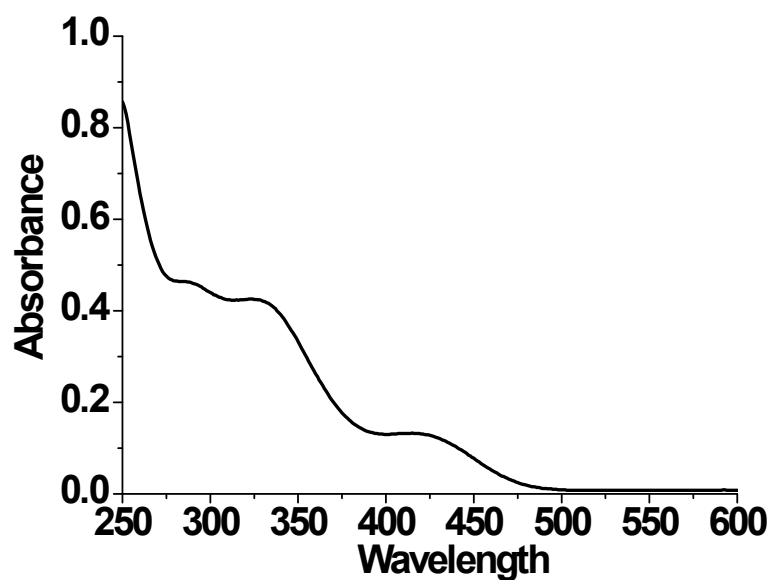

Figure. S1 UV-vis spectra of ITP-TPE ( $2 \times 10^{-5}$  M) in CH<sub>3</sub>CN solution.

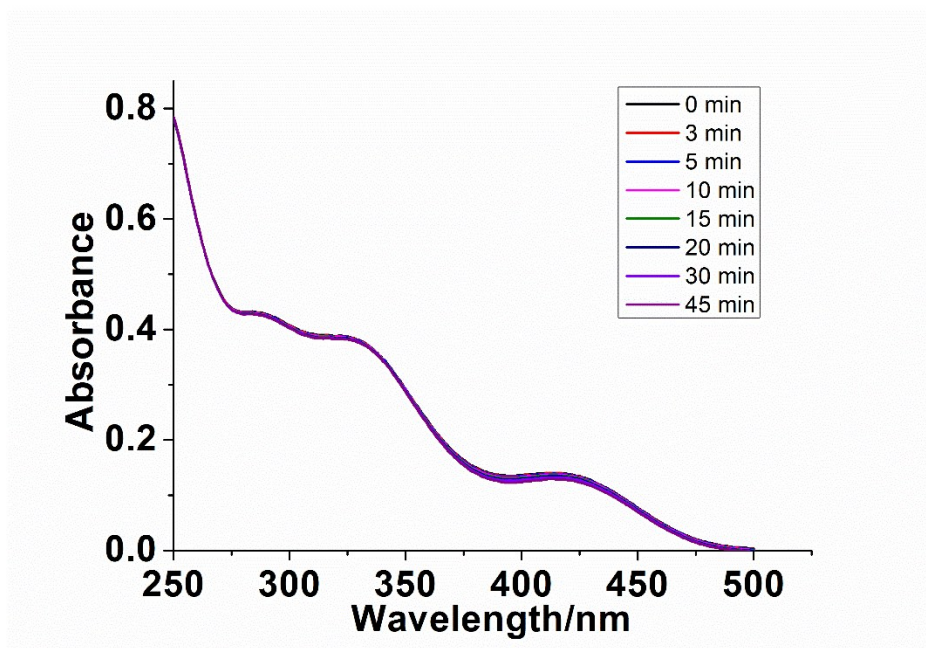

Figure. S2 UV-vis spectra of ITP-TPE ( $2 \times 10^{-5}$  M) in CH<sub>3</sub>CN solution at different irradiation time.

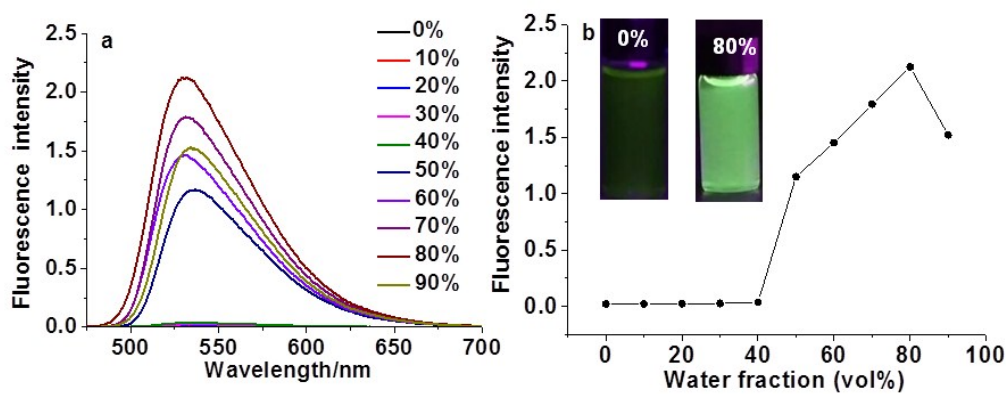

**Figure.S3** Fluorescence spectra of ITP-TPE (a) in  $\text{CH}_3\text{CN}$ -water mixtures ( $1.0 \times 10^{-5}$  M, with varied volumetric fractions of water; (b) the fluorescence intensity change spectra of ITP-TPE at different content of water.

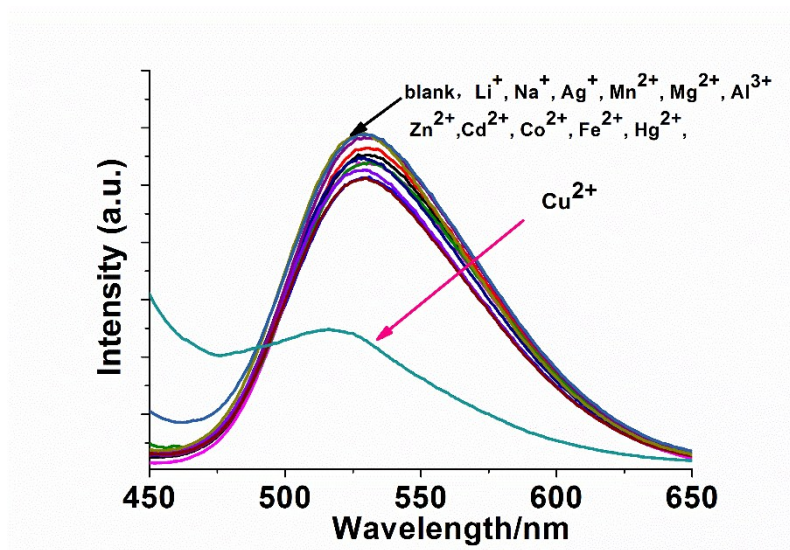

**Figure.S4** Back titration fluorescence spectra of ITP-TPE ( $2 \times 10^{-5}$  M) in  $\text{CH}_3\text{CN}$ -water (9:1) solution upon addition of 1 equiv. of various metal ions.

### Detection Limit Calculation for This Method <sup>S1</sup>:

Through fluorometric titrations, the detection limit for  $\text{Cu}^{2+}$  was determined. According to the definition, detection limit =  $3S_{\text{bi}}/k$ , where  $S_{\text{bi}}$  is standard deviation of 6 blank measurements and  $k$  is the slope obtained from the calibration curve. In this method, the standard deviation  $S_{\text{bi}}$  of 671 and the slope from the graph  $k$  of 48478 are calculated. Therefore, the detection limit =  $4 \times 10^{-7}$  M ( $R = 0.98$ ) can be obtained.

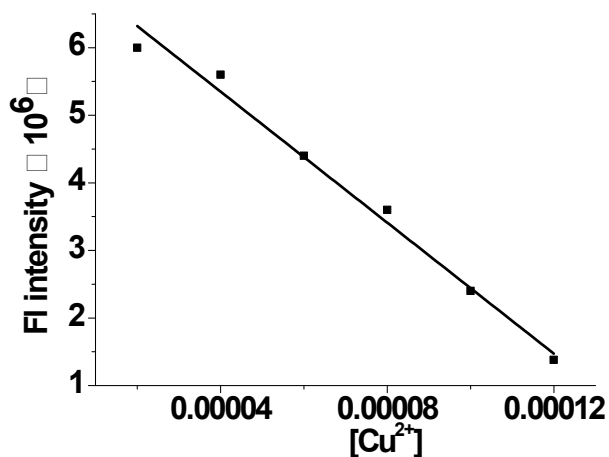

**Figure. S5** Linear relationship between fluorescence intensity of ITP-TPE ( $2 \times 10^{-5}$  M in  $\text{CH}_3\text{CN}$ ) at 402 nm and the concentration of  $\text{Cu}^{2+}$  ( $0.1 - 2 \times 10^{-5}$  M) in  $\text{CH}_3\text{CN}$ .

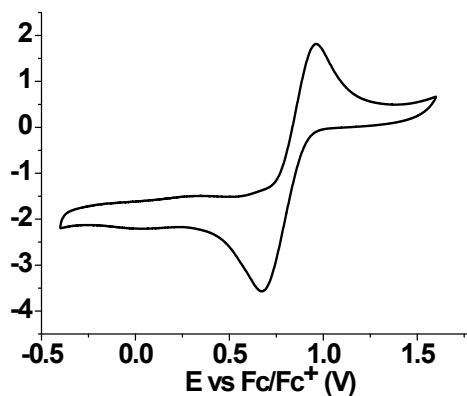

**Figure. S6** Cyclic voltammograms of  $\text{Cu}(\text{CF}_3\text{SO}_3)_2$  measured in  $\text{CH}_3\text{CN}$  (0.1 mol/L  $n\text{-Bu}_4\text{NPF}_6$ ) at a scan rate of 100 mV/s.

## 2 $^1\text{H}$ and $^{13}\text{C}$ NMR Spectra for New Compounds

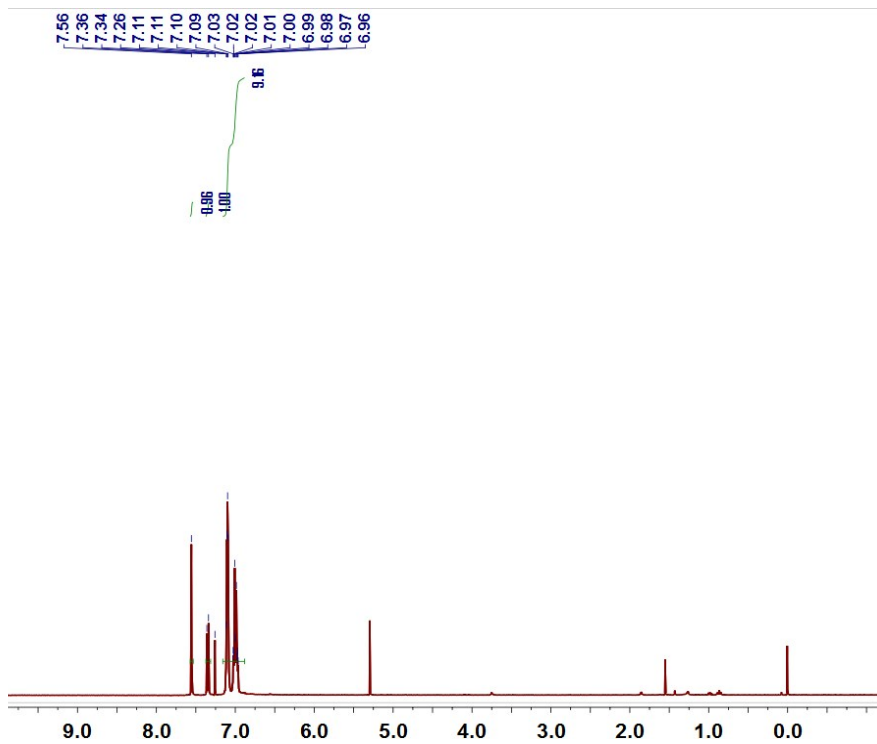

Figure. S7.  $^1\text{H}$  NMR spectra of compound 2 (400MHz,  $\text{CDCl}_3$ , ppm)

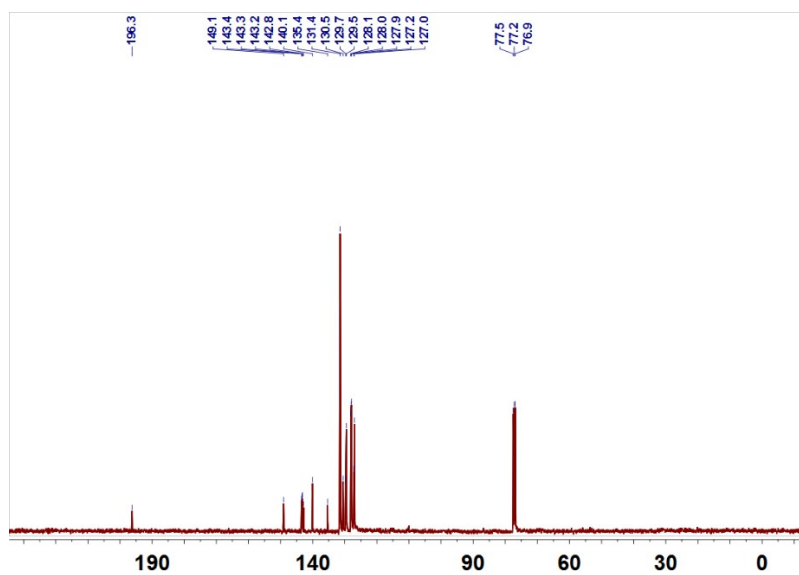

Figure. S8.  $^{13}\text{C}$  NMR spectra of compound 2 (100MHz,  $\text{CDCl}_3$ , ppm)

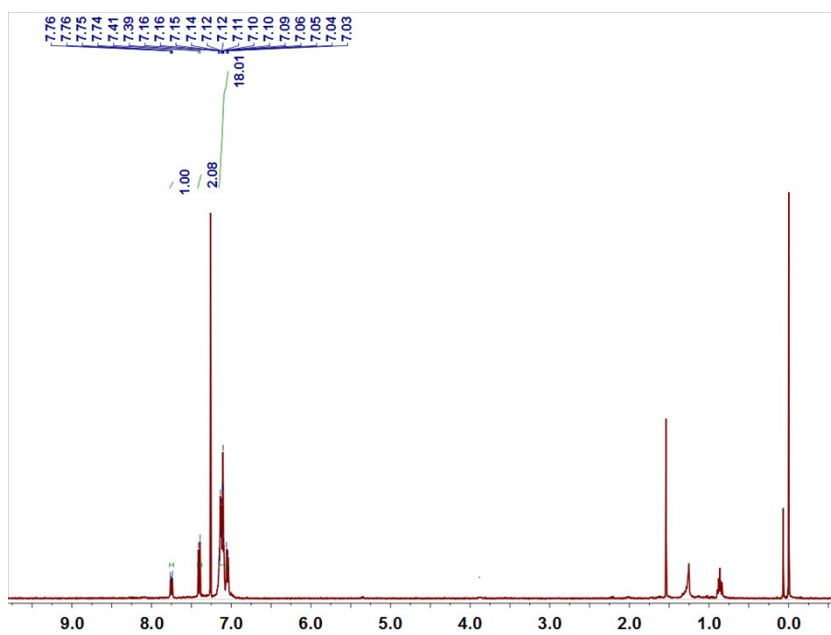

**Figure. S9**  $^1\text{H}$  NMR spectra of compound ITP-TPE (400MHz,  $\text{CDCl}_3$ , ppm)

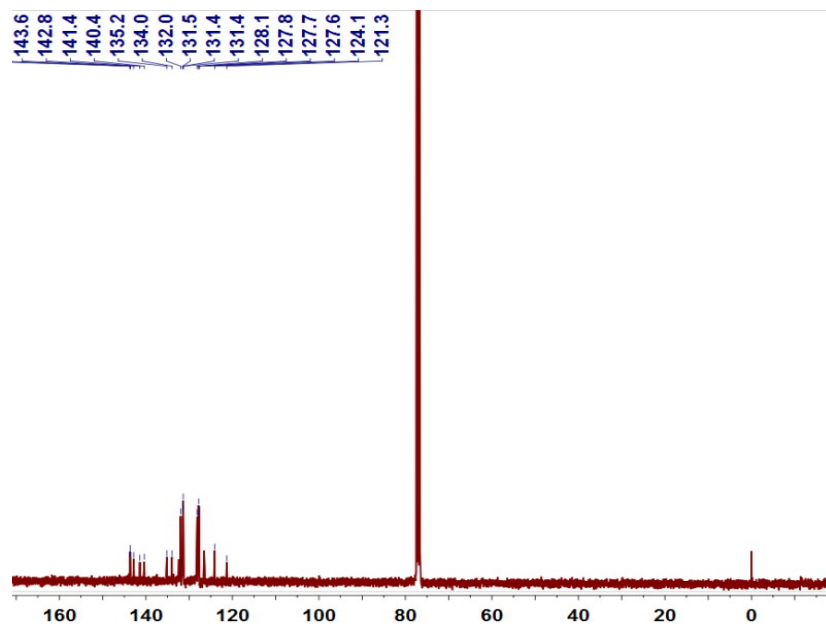

**Figure. S10**  $^{13}\text{C}$  NMR spectra of compound ITP-TPE (100MHz,  $\text{CDCl}_3$ , ppm)

## Mass Spectrum SmartFormula Report

|                      |                                          |                   |                      |
|----------------------|------------------------------------------|-------------------|----------------------|
| <b>Analysis Info</b> |                                          | Acquisition Date  | 6/18/2015 3:22:19 PM |
| Analysis Name        | D:\Data\gaojh\QTOF-Gaojh150618-trz1-01.d | Operator          | Jiang                |
| Method               | tune-posAPCI-300-1200_1411111.m          | Instrument / Ser# | micrOTOF-Q II 10324  |
| Sample Name          | trz1                                     |                   |                      |
| Comment              |                                          |                   |                      |

|                              |          |                       |           |                  |           |
|------------------------------|----------|-----------------------|-----------|------------------|-----------|
| <b>Acquisition Parameter</b> |          |                       |           |                  |           |
| Source Type                  | APCI     | Ion Polarity          | Positive  | Set Nebulizer    | 2.0 Bar   |
| Focus                        | Active   | Set Capillary         | 4500 V    | Set Dry Heater   | 200 °C    |
| Scan Begin                   | 200 m/z  | Set End Plate Offset  | -500 V    | Set Dry Gas      | 1.2 l/min |
| Scan End                     | 1200 m/z | Set Collision Cell RF | 120.0 Vpp | Set Divert Valve | Source    |

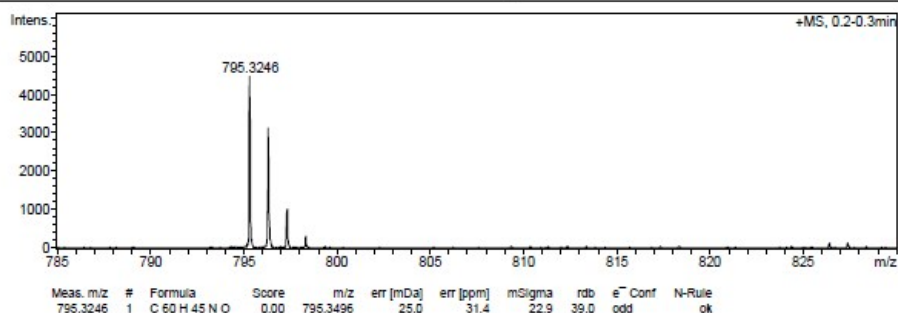

Figure S11. NMRS of 2

## Mass Spectrum SmartFormula Report

|                      |                                          |                   |                      |
|----------------------|------------------------------------------|-------------------|----------------------|
| <b>Analysis Info</b> |                                          | Acquisition Date  | 6/18/2015 3:26:08 PM |
| Analysis Name        | D:\Data\gaojh\QTOF-Gaojh150618-trz3-01.d | Operator          | Jiang                |
| Method               | tune-posAPCI-300-1200_1411111.m          | Instrument / Ser# | micrOTOF-Q II 10324  |
| Sample Name          | trz3                                     |                   |                      |
| Comment              |                                          |                   |                      |

|                              |          |                       |           |                  |           |
|------------------------------|----------|-----------------------|-----------|------------------|-----------|
| <b>Acquisition Parameter</b> |          |                       |           |                  |           |
| Source Type                  | APCI     | Ion Polarity          | Positive  | Set Nebulizer    | 2.0 Bar   |
| Focus                        | Active   | Set Capillary         | 4500 V    | Set Dry Heater   | 200 °C    |
| Scan Begin                   | 200 m/z  | Set End Plate Offset  | -500 V    | Set Dry Gas      | 1.2 l/min |
| Scan End                     | 1200 m/z | Set Collision Cell RF | 120.0 Vpp | Set Divert Valve | Source    |

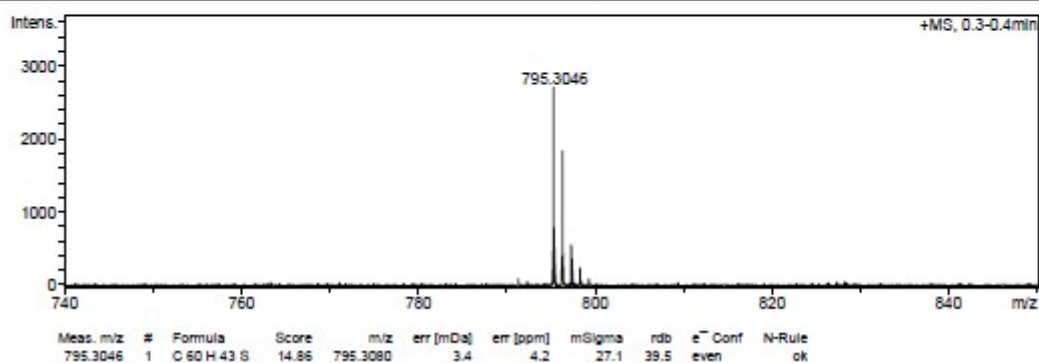

Figure S12. NMRS of ITP-TPE

### 3 References

S1 (a) V. Thomsen, D. Schatzlein, and D. Mercurio, *Spectroscopy*, 2003, **18**, 112; (b) F. Zheng, F. Zeng, C. Yu, X. Hou and S. Wu, *Chem. Eur.J.*, 2013, **19**, 936; (c) A. Roy, D. Kand, T. Saha, P. Talukdar, *Chem. Commun.*, 2014, **50**, 5510.
